# Supplementary material for: A multiferroic vanadium phosphide monolayer with ferromagnetic half-metallicity and topological Dirac states
Source: Royal Society of Chemistry journal article supplement (doi:10.1039/d1nh00353d), 2021-12-06
Supplement: d1nh00353d1.pdf [file d1nh00353d1.pdf]

## Multiferroic vanadium phosphide monolayer with ferromagnetic half-metallicity and topological Dirac states

Xiaoyu Xuan<sup>a</sup>, Menghao Wu<sup>b</sup>, Zhuhua Zhang<sup>\*a</sup> and Wanlin Guo<sup>a</sup>

<sup>a</sup> State Key Laboratory of Mechanics and Control of Mechanical Structures, Key Laboratory for Intelligent Nano Materials and Devices of Ministry of Education, and Institute of Nanoscience, Nanjing University of Aeronautics and Astronautics, Nanjing 210016, China

<sup>b</sup> School of Physics and Wuhan National High Magnetic Field Center, Huazhong University of Science and Technology, Wuhan 430074, China

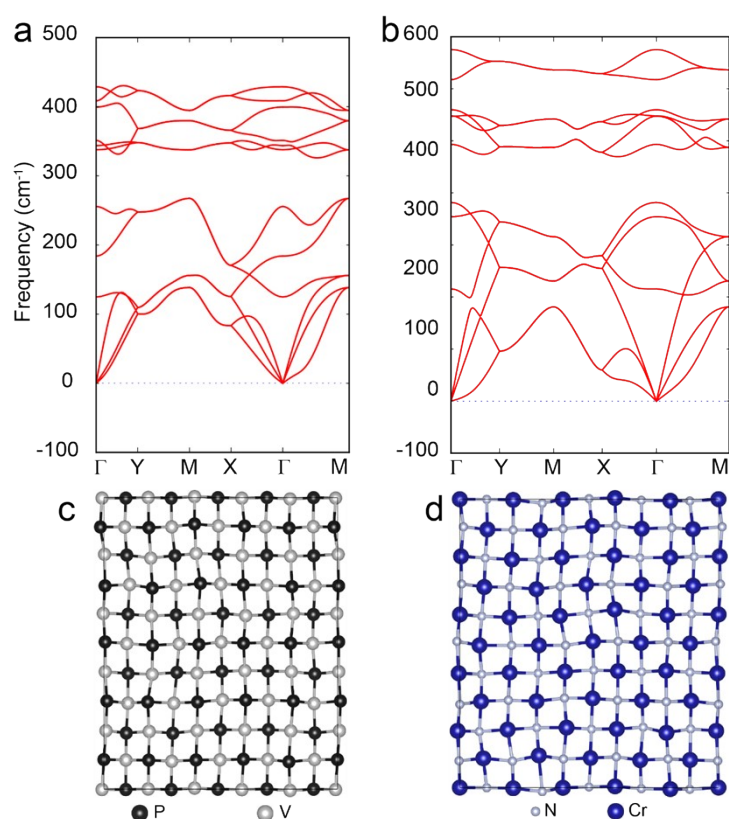

Figure S1. (a, b) Calculated phonon spectra of the t-VP and t-CrN monolayers. (c, d) Snapshots of the two monolayers at the end of 10 ps ab initio molecular dynamics simulations at 500 K.

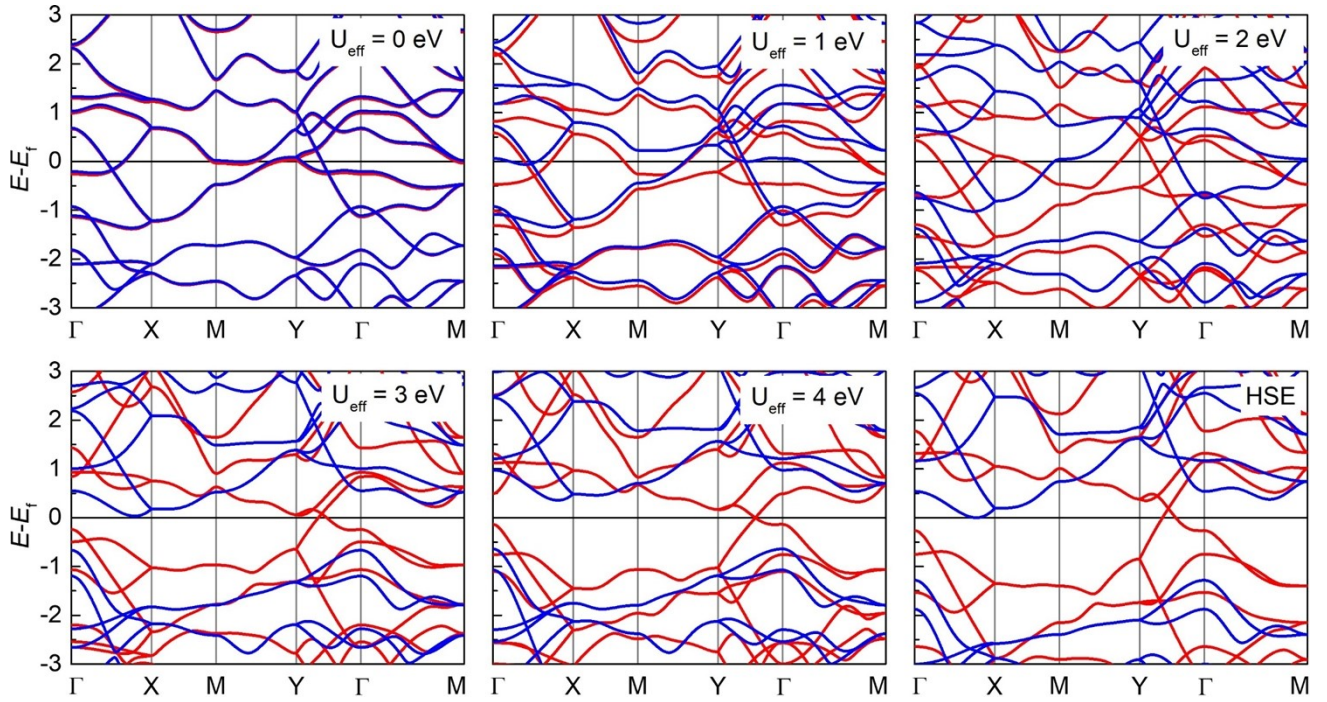

Figure S2. Band structures of the t-VP monolayer without the SOC calculated with the DFT+U method (the values of  $U_{\text{eff}}$  are provided) and HSE06 functional. The red and blue lines present the spin-up and spin-down band structures, respectively.

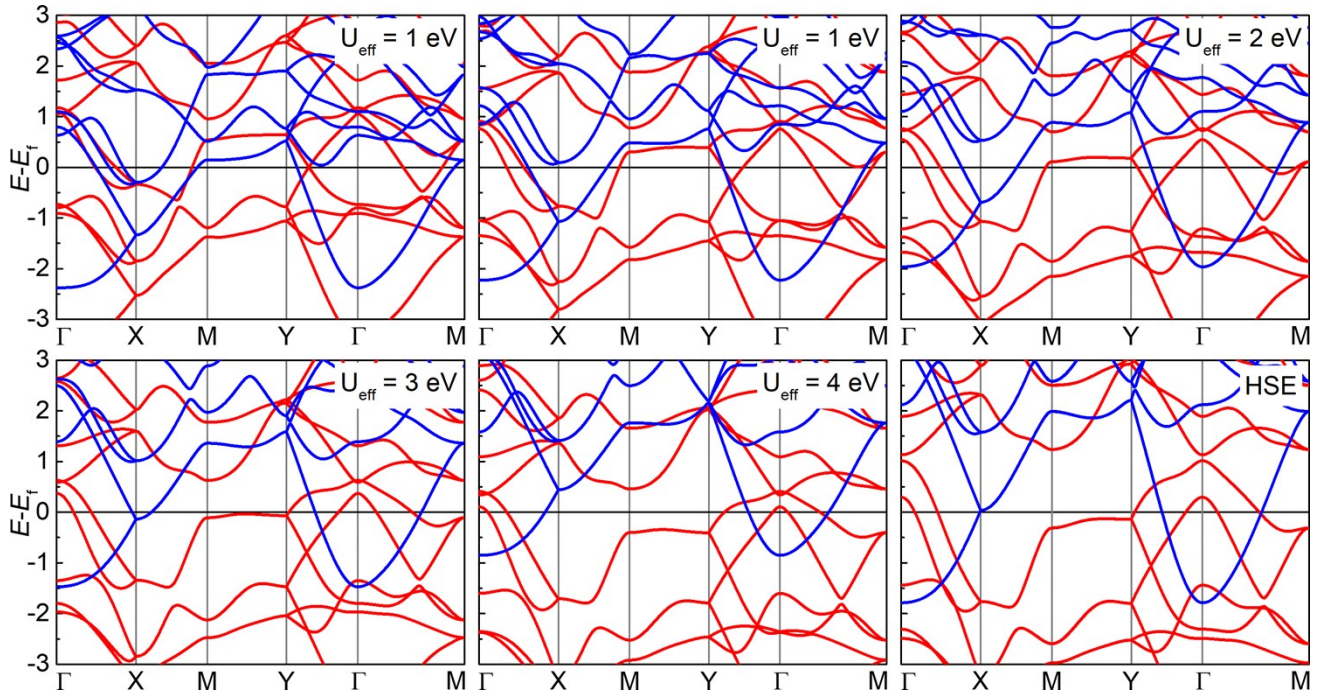

Figure S3. Band structures of the t-CrN monolayer without the SOC calculated with the DFT+U method (the values of  $U_{\text{eff}}$  are provided) and HSE06 functional. The red and blue lines present the spin-up and spin-down band structures, respectively.

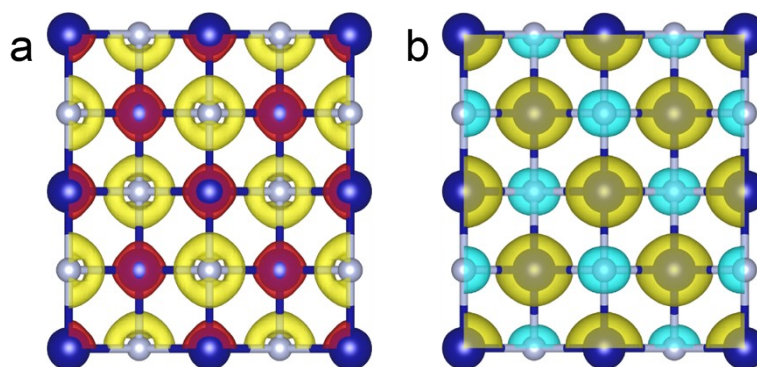

Figure S4. Isosurface plots of deformation electronic density (a,  $0.134 \text{ e}/\text{\AA}^3$ ) and spin polarization distribution (b,  $0.134 \text{ e}/\text{\AA}^3$ ) of the t-CrN monolayer. Bader charge analysis shows that a charge transfer of  $0.60 \text{ e}$  from each Cr atom to N atom (from deep red to yellow). The transferred electrons in the t-CrN monolayer are mainly from  $3 d_{xz,yz}$  orbitals of Cr atoms and delocalize around N atoms in  $3 p_{x,y}$  orbitals.

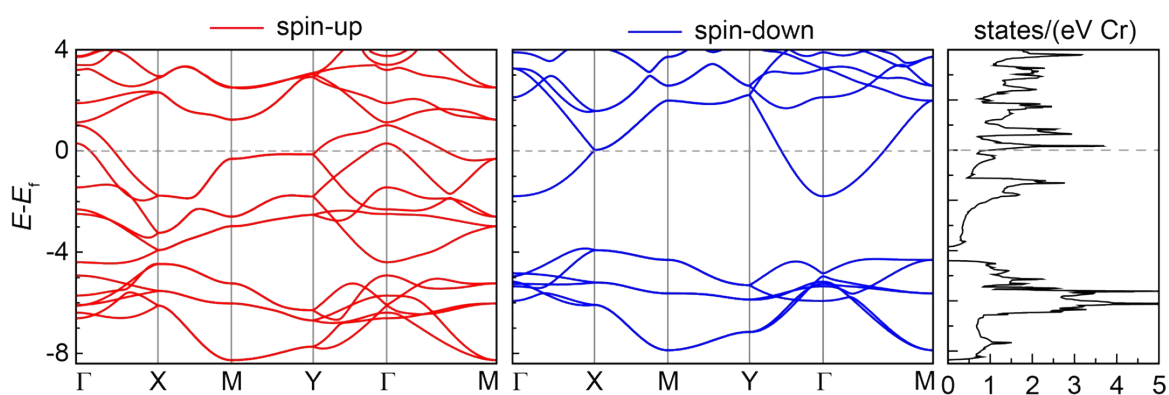

Figure S5. Spin-polarized band structures and density of states of the t-CrN monolayer in its non-magnetic state, calculated with the HSE06 functional.
